# Supplementary material for: HCK promotes glioblastoma progression by TGFβ signaling
Source: Oxford University Press journal article supplement (doi:10.1042/bsr20200975), 2020-06-01

Supplementary Figure 1: HCK was closely associated with EMT (a) and TGF  $\beta$  signaling (b) in GBM.

Supplementary Figure 1

a

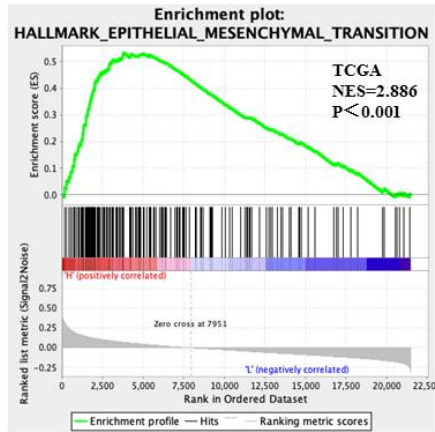

b

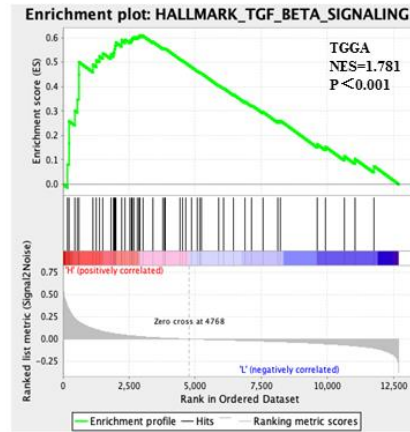

Supplement: bsr-2020-0975_supp.pdf [file bsr-2020-0975_supp.pdf]
